# Supplementary material for: Rosuvastatin versus atorvastatin treatment in adults with coronary artery disease: secondary analysis of the randomised LODESTAR trial
Source: PubMed Central journal article supplement — BMJ. 2023 Oct 18;383:e075837. doi: 10.1136/bmj-2023-075837 (PMC10583134; doi:10.1136/bmj-2023-075837), 2023-10-18
Supplement: leey075837.ww.pdf [file leey075837.ww.pdf]

## **Supplementary methods.**

### **Definition of secondary outcomes**

Hospital admissions due to heart failure was defined as hospital admissions requiring at least an overnight stay due to substantial worsening of heart failure symptoms or signs requiring the augmentation of oral drugs or the new administration of intravenous heart failure therapy, including diuretics, inotropes, or vasodilators.<sup>1</sup> Deep vein thrombosis was diagnosed when thrombi in deep veins of the lower extremity were found by imaging studies such as compression ultrasonography or computed tomography.<sup>2</sup> Pulmonary thromboembolism was defined as the appearance of a thrombus in the pulmonary arteries in a ventilation-perfusion lung scan, pulmonary angiography, or computed tomography.<sup>2</sup> Aortic intervention or surgery involved any endovascular procedure or surgery to treat aorta disease. End stage kidney disease was defined as stage 5 according to the National Kidney Foundation Kidney Disease Outcomes Quality Initiative classification of chronic kidney disease or disease requiring dialysis, irrespective of the glomerular filtration rate.<sup>3</sup> The composite of laboratory detected abnormalities considered increase in aminotransferase (>baseline level and >3 times the upper reference limit), creatine kinase (>baseline level and >5 times the upper reference limit), and creatinine levels (>50% increase from baseline level and greater than the upper reference limit).

### **References**

1. Zannad F, Garcia AA, Anker SD, et al. Clinical outcome endpoints in heart failure trials: a European Society of Cardiology Heart Failure Association consensus document. *Eur J Heart Fail* 2013;15:1082-94.
2. Baglin T, Luddington R, Brown K, Baglin C. Incidence of recurrent venous thromboembolism in relation to clinical and thrombophilic risk factors: prospective cohort study. *Lancet* 2003;362:523-26.
3. Levin A, Stevens PE. Summary of KDIGO 2012 CKD guideline: behind the scenes, need for guidance, and a framework for moving forward. *Kidney Int* 2014;85:49-61.

## Supplementary table S1. Inclusion and exclusion criteria

---

### **Inclusion Criteria**

- Age  $\geq 19$  years
- Clinical diagnosis of coronary artery disease: stable angina, unstable angina, acute non-ST elevation myocardial infarction, or acute ST elevation myocardial infarction
- Provision of signed informed consent

### **Exclusion Criteria**

- Pregnancy or potential pregnancy during the study period
  - Severe adverse events or hypersensitivity to statin
  - Receiving a drug that interacts with statin (strong inhibitor of cytochrome p-450 3A4 or 2C9)
  - Risk factors for myopathy, hereditary muscle disorder, hypothyroidism, alcohol use disorder, severe hepatic dysfunction (3 times the normal reference values), or rhabdomyolysis
  - Life expectancy  $< 3$  years
  - Patients who could not be followed for more than 1 year
  - Patients who could not understand the consent form
-

**Supplementary table S2. Reasons for death and withdrawal of consent**

|                                    | <b>Rosuvastatin group</b> | <b>Atorvastatin group</b> |
|------------------------------------|---------------------------|---------------------------|
| <b>Death</b>                       | 57                        | 51                        |
| Myocardial infarction              | 1 (1.8)                   | 2 (3.9)                   |
| Heart failure                      | 2 (3.5)                   | 1 (2.0)                   |
| Sudden cardiac death               | 9 (15.8)                  | 9 (17.6)                  |
| Pneumonia                          | 15 (26.3)                 | 11 (21.6)                 |
| Urinary tract infection            | 1 (1.8)                   | 3 (5.9)                   |
| Malignancy                         | 23 (40.4)                 | 18 (35.3)                 |
| Intracranial hemorrhage            | 3 (5.3)                   | 1 (2.0)                   |
| Other (non-cardiovascular)         | 1 (1.8)                   | 3 (5.9)                   |
| Unknown                            | 2 (3.5)                   | 3 (5.9)                   |
| <b>Withdrawal of consent</b>       | 16                        | 14                        |
| Voluntary withdrawal by patients   | 13 (81.3)                 | 12 (85.7)                 |
| Withdrawal by physicians' decision | 3 (18.7)                  | 2 (14.3)                  |

**Supplementary table S3. Lipid-lowering treatment**

|                                  | 0 – 6 weeks       |                   | 6 weeks – 3 months |                   | 3 – 6 months      |                   | 6 months – 1 year |                   | 1 – 2 years       |                   | 2 – 3 years       |                   |
|----------------------------------|-------------------|-------------------|--------------------|-------------------|-------------------|-------------------|-------------------|-------------------|-------------------|-------------------|-------------------|-------------------|
|                                  | Rosuva-<br>statin | Atorva-<br>statin | Rosuva-<br>statin  | Atorva-<br>statin | Rosuva-<br>statin | Atorva-<br>statin | Rosuva-<br>statin | Atorva-<br>statin | Rosuva-<br>statin | Atorva-<br>statin | Rosuva-<br>statin | Atorva-<br>statin |
| <b>Total number of patients</b>  | <b>2204</b>       | <b>2196</b>       | <b>2190</b>        | <b>2184</b>       | <b>2189</b>       | <b>2177</b>       | <b>2184</b>       | <b>2175</b>       | <b>2167</b>       | <b>2163</b>       | <b>2141</b>       | <b>2134</b>       |
| <b>Statin therapy</b>            |                   |                   |                    |                   |                   |                   |                   |                   |                   |                   |                   |                   |
| <b>High intensity statin</b>     |                   |                   |                    |                   |                   |                   |                   |                   |                   |                   |                   |                   |
| Number of patients               | 1602 (73)         | 1596 (73)         | 1599 (73)          | 1616 (74)         | 1587 (73)         | 1618 (74)         | 1569 (72)         | 1611 (74)         | 1557 (72)         | 1615 (75)         | 1517 (71)         | 1580 (74)         |
| Atorvastatin 80 mg               | 0                 | 7                 | 1                  | 14                | 1                 | 14                | 1                 | 14                | 7                 | 52                | 10                | 55                |
| Atorvastatin 40 mg               | 104               | 1507              | 92                 | 1519              | 92                | 1518              | 90                | 1511              | 92                | 1468              | 91                | 1420              |
| Rosuvastatin 20 mg               | 1498              | 82                | 1506               | 83                | 1494              | 86                | 1478              | 86                | 1458              | 95                | 1416              | 105               |
| <b>Moderate intensity statin</b> |                   |                   |                    |                   |                   |                   |                   |                   |                   |                   |                   |                   |
| Number of patients               | 600 (27)          | 597 (27)          | 569 (26)           | 548 (25)          | 565 (26)          | 530 (24)          | 569 (26)          | 519 (24)          | 555(26)           | 488 (23)          | 562 (26)          | 488 (23)          |
| Atorvastatin 20 or 10 mg         | 28                | 543               | 43                 | 474               | 40                | 459               | 42                | 449               | 52                | 402               | 65                | 376               |
| Rosuvastatin 10 or 5 mg          | 571               | 53                | 520                | 69                | 520               | 67                | 522               | 66                | 489               | 70                | 483               | 104               |
| Simvastatin 40 or 20 mg          | 0                 | 1                 | 2                  | 1                 | 2                 | 0                 | 3                 | 1                 | 4                 | 2                 | 0                 | 0                 |
| Pravastatin 40 mg                | 0                 | 0                 | 0                  | 1                 | 0                 | 1                 | 0                 | 1                 | 0                 | 0                 | 0                 | 0                 |
| Pitavastatin 4, 2 or 1 mg        | 1                 | 0                 | 4                  | 1                 | 3                 | 1                 | 2                 | 0                 | 8                 | 4                 | 12                | 8                 |
| Fluvastatin XL 80 mg             | 0                 | 0                 | 0                  | 2                 | 0                 | 2                 | 0                 | 2                 | 2                 | 0                 | 2                 | 0                 |
| <b>Low intensity statin</b>      |                   |                   |                    |                   |                   |                   |                   |                   |                   |                   |                   |                   |
| Number of patients               | 2 (<1)            | 3 (<1)            | 5 (<1)             | 7 (<1)            | 6 (<1)            | 10 (<1)           | 5 (<1)            | 13 (<1)           | 7 (<1)            | 22 (1)            | 8 (<1)            | 21 (1)            |
| Atorvastatin 5 mg                | 0                 | 2                 | 1                  | 4                 | 2                 | 6                 | 2                 | 9                 | 3                 | 18                | 3                 | 19                |
| Rosuvastatin 2.5 mg              | 1                 | 1                 | 1                  | 1                 | 1                 | 1                 | 1                 | 1                 | 3                 | 1                 | 3                 | 1                 |
| Simvastatin 10 mg                | 1                 | 0                 | 2                  | 1                 | 2                 | 2                 | 1                 | 2                 | 0                 | 2                 | 0                 | 0                 |
| Pravastatin 20 or 10 mg          |                   |                   | 1                  | 1                 | 1                 | 1                 | 1                 | 1                 | 1                 | 1                 | 2                 | 1                 |
| <b>Discontinuation of statin</b> |                   |                   |                    |                   |                   |                   |                   |                   |                   |                   |                   |                   |
| Number of patients               | 0                 | 0                 | 17 (<1)            | 13 (<1)           | 31 (1)            | 19 (<1)           | 41 (2)            | 32 (2)            | 48 (2)            | 38 (2)            | 54 (3)            | 45 (2)            |
| <b>Ezetimibe</b>                 |                   |                   |                    |                   |                   |                   |                   |                   |                   |                   |                   |                   |
| Number of patients               | 18 (<1)           | 13 (<1)           | 97 (4)             | 137 (6)           | 110 (5)           | 148 (7)           | 150 (7)           | 215 (10)          | 200 (9)           | 294 (14)          | 252 (12)          | 402 (19)          |
| With high-intensity statin       | 13                | 11                | 87                 | 128               | 94                | 135               | 132               | 194               | 169               | 258               | 200               | 349               |
| With moderate-intensity statin   | 4                 | 2                 | 8                  | 8                 | 13                | 11                | 16                | 17                | 30                | 33                | 51                | 51                |
| With low-intensity statin        | 1                 | 0                 | 2                  | 1                 | 2                 | 2                 | 1                 | 2                 | 0                 | 2                 | 0                 | 0                 |
| Ezetimibe only without statin    | 0                 | 0                 | 0                  | 0                 | 1                 | 0                 | 1                 | 2                 | 1                 | 1                 | 1                 | 2                 |
| <b>Fibrate</b>                   |                   |                   |                    |                   |                   |                   |                   |                   |                   |                   |                   |                   |
| Number of patients               | 18 (<1)           | 21 (1)            | 18 (<1)            | 21 (1)            | 17 (<1)           | 18 (<1)           | 16 (<1)           | 20 (<1)           | 19 (<1)           | 23 (1)            | 21 (1)            | 18 (<1)           |

**Supplementary table S4. Use of high intensity statin**

|                     | <b>Rosuvastatin group</b> | <b>Atorvastatin group</b> | <b>Absolute difference (95% CI)</b> | <b>P-value</b> |
|---------------------|---------------------------|---------------------------|-------------------------------------|----------------|
| 0 – 6 weeks         | 1602 / 2204 (72.7)        | 1596 / 2196 (72.7)        | 0.0 (-2.6 to 2.6)                   | 1.00           |
| 6 week – 3 months   | 1599 / 2190 (73.0)        | 1616 / 2184 (74.0)        | -1.0 (-3.6 to 1.6)                  | 0.48           |
| 3 months – 6 months | 1587 / 2189 (72.5)        | 1618 / 2177 (74.3)        | -1.8 (-4.4 to 0.8)                  | 0.18           |
| 6 months – 1 year   | 1569 / 2184 (71.8)        | 1611 / 2175 (74.1)        | -2.2 (-4.9 to 0.4)                  | 0.11           |
| 1 year – 2 years    | 1557 / 2167 (71.9)        | 1615 / 2163 (74.7)        | -2.8 (-5.4 to -0.2)                 | 0.04           |
| 2 years – 3 years   | 1517 / 2141 (70.9)        | 1580 / 2134 (74.0)        | -3.2 (-5.9 to -0.5)                 | 0.02           |

Data are number of patients / total number of patients (%). CI=confidence interval.

**Supplementary table S5. Use of ezetimibe**

|                     | <b>Rosuvastatin group</b> | <b>Atorvastatin group</b> | <b>Absolute difference (95% CI)</b> | <b>P-value</b> |
|---------------------|---------------------------|---------------------------|-------------------------------------|----------------|
| 0 – 6 weeks         | 18 / 2204 (0.8)           | 13 / 2196 (0.6)           | 0.2 (-0.3 to 0.7)                   | 0.48           |
| 6 week – 3 months   | 97 / 2190 (4.4)           | 137 / 2184 (6.3)          | -1.8 (-3.2 to -0.5)                 | 0.008          |
| 3 months – 6 months | 110 / 2189 (5.0)          | 148 / 2177 (6.8)          | -1.8 (-3.2 to -0.4)                 | 0.02           |
| 6 months – 1 year   | 150 / 2184 (6.9)          | 215 / 2175 (9.9)          | -3.0 (-4.7 to -1.4)                 | <0.001         |
| 1 year – 2 years    | 200 / 2167 (9.2)          | 295 / 2163 (13.6)         | -4.4 (-6.3 to -2.5)                 | <0.001         |
| 2 years – 3 years   | 252 / 2141 (11.8)         | 402 / 2134 (18.8)         | -7.1 (-9.2 to -4.9)                 | <0.001         |

Data are number of patients / total number of patients (%). CI=confidence interval.

**Supplementary table S6. Cardiovascular medications**

|                                 | 0 – 6 weeks       |                   | 6 weeks – 3 months |                   | 3 – 6 months      |                   | 6 months – 1 year |                   | 1 – 2 years       |                   | 2 – 3 years       |                   |
|---------------------------------|-------------------|-------------------|--------------------|-------------------|-------------------|-------------------|-------------------|-------------------|-------------------|-------------------|-------------------|-------------------|
|                                 | Rosuva-<br>statin | Atorva-<br>statin | Rosuva-<br>statin  | Atorva-<br>statin | Rosuva-<br>statin | Atorva-<br>statin | Rosuva-<br>statin | Atorva-<br>statin | Rosuva-<br>statin | Atorva-<br>statin | Rosuva-<br>statin | Atorva-<br>statin |
| <b>Total number of patients</b> | <b>2204</b>       | <b>2196</b>       | <b>2190</b>        | <b>2184</b>       | <b>2189</b>       | <b>2177</b>       | <b>2184</b>       | <b>2175</b>       | <b>2167</b>       | <b>2163</b>       | <b>2141</b>       | <b>2134</b>       |
| Aspirin                         | 1616 (73)         | 1601 (73)         | 1565 (72)          | 1565 (72)         | 1539 (70)         | 1549 (71)         | 1504 (69)         | 1512 (70)         | 1343 (62)         | 1373 (64)         | 1237 (58)         | 1252 (59)         |
| Clopidogrel                     | 1060 (48)         | 1018 (46)         | 1039 (47)          | 1024 (47)         | 1041 (48)         | 1016 (47)         | 1029 (47)         | 993 (46)          | 1024 (47)         | 1077 (50)         | 1016 (48)         | 1071 (50)         |
| Prasugrel or Ticagrelor         | 144 (7)           | 177 (8)           | 133 (6)            | 163 (7)           | 126 (6)           | 153 (7)           | 107 (5)           | 144 (7)           | 53 (2)            | 49 (2)            | 16 (<1)           | 17 (<1)           |
| Beta-blocker                    | 1196 (54)         | 1240 (57)         | 1190 (54)          | 1249 (57)         | 1195 (55)         | 1244 (57)         | 1191 (55)         | 1234 (57)         | 1157 (53)         | 1205 (56)         | 1129 (53)         | 1179 (55)         |
| ACE inhibitor                   | 318 (14)          | 265 (12)          | 291 (13)           | 250 (11)          | 276 (13)          | 246 (11)          | 262 (12)          | 239 (11)          | 229 (11)          | 223 (10)          | 216 (10)          | 220 (9)           |
| ARB                             | 958 (44)          | 905 (41)          | 968 (44)           | 931 (43)          | 987 (45)          | 935 (43)          | 990 (45)          | 930 (43)          | 998 (46)          | 943 (44)          | 1001 (47)         | 977 (46)          |
| Calcium channel blocker         | 951 (43)          | 933 (43)          | 948 (43)           | 936 (43)          | 952 (44)          | 934 (43)          | 964 (44)          | 939 (43)          | 973 (45)          | 936 (43)          | 959 (45)          | 949 (45)          |
| Loop diuretics                  | 119 (5)           | 138 (6)           | 113 (5)            | 132 (6)           | 114 (5)           | 130 (6)           | 108 (5)           | 124 (6)           | 102 (5)           | 120 (6)           | 103 (5)           | 115 (5)           |
| Spironolactone                  | 51 (2)            | 67 (3)            | 49 (2)             | 61 (3)            | 48 (2)            | 60 (3)            | 43 (2)            | 58 (3)            | 43 (2)            | 50 (2)            | 42 (2)            | 55 (3)            |

ACE=angiotensin-converting enzyme; ARB=Angiotensin II receptor blocker.

**Supplementary table S7. Primary and secondary outcomes in the per-protocol population.\* Values are number (percentage) unless stated otherwise**

| <b>Outcome</b>                                                                     | <b>Rosuvastatin group (n=1996)</b> | <b>Atorvastatin group (n=1965)</b> | <b>Absolute difference (95% CI)</b> | <b>Hazard ratio (95% CI)</b> | <b>P-value†</b> |
|------------------------------------------------------------------------------------|------------------------------------|------------------------------------|-------------------------------------|------------------------------|-----------------|
| <b>Primary outcome</b>                                                             |                                    |                                    |                                     |                              |                 |
| Death, myocardial infarction, stroke, or any coronary revascularization            | 159 (8.0)                          | 141 (7.2)                          | 0.8 (-0.9 to 2.5)                   | 1.11 (0.89 to 1.40)          | 0.35            |
| <b>Components of primary outcome</b>                                               |                                    |                                    |                                     |                              |                 |
| Death:                                                                             | 47 (2.4)                           | 46 (2.4)                           | 0.0 (-0.9 to 1.0)                   | 1.01 (0.67 to 1.51)          | 0.98            |
| Cardiac death (No)                                                                 | 10                                 | 15                                 |                                     |                              |                 |
| Myocardial infarction                                                              | 31 (1.5)                           | 21 (1.1)                           | 0.5 (-0.3 to 1.2)                   | 1.41 (0.81 to 2.50)          | 0.23            |
| Stroke:                                                                            | 17 (0.9)                           | 18 (0.9)                           | -0.1 (-0.7 to 0.5)                  | 0.93 (0.48 to 1.80)          | 0.83            |
| Ischemic (No)                                                                      | 11                                 | 14                                 |                                     |                              |                 |
| Hemorrhagic (No)                                                                   | 6                                  | 4                                  |                                     |                              |                 |
| Coronary revascularization‡                                                        | 97 (5.0)                           | 82 (4.3)                           | 0.7 (-0.6 to 2.0)                   | 1.17 (0.87 to 1.57)          | 0.30            |
| <b>Secondary outcomes</b>                                                          |                                    |                                    |                                     |                              |                 |
| New-onset diabetes mellitus                                                        | 139 (7.1)                          | 107 (5.6)                          | 1.6 (0.0 to 3.1)                    | 1.29 (1.00 to 1.66)          | 0.05            |
| New-onset diabetes mellitus among patients without diabetes mellitus at baseline § | 139/1348 (10.5)                    | 107/1300 (8.4)                     |                                     | 1.26 (0.98 to 1.62)          | 0.07            |
| Initiation of antidiabetics among patients without diabetes mellitus at baseline § | 96/1348 (7.3)                      | 67/1300 (5.3)                      |                                     | 1.39 (1.02 to 1.89)          | 0.04            |
| Hospital admission due to heart failure                                            | 8 (0.4)                            | 7 (0.4)                            | 0.0 (-0.3 to 0.4)                   | 1.13 (0.41 to 3.10)          | 0.82            |
| Deep vein thrombosis or pulmonary embolism:                                        | 6 (0.3)                            | 2 (0.1)                            | 0.2 (-0.1 to 0.5)                   | 2.96 (0.60 to 14.66)         | 0.16            |
| Deep vein thrombosis (No)                                                          | 4                                  | 2                                  |                                     |                              |                 |
| Pulmonary embolism (No)                                                            | 3                                  | 0                                  |                                     |                              |                 |
| Peripheral artery revascularization                                                | 10 (0.5)                           | 15 (0.8)                           | -0.3 (-0.8 to 0.2)                  | 0.59 (0.26-1.35)             | 0.21            |
| Aortic intervention or surgery:                                                    | 2 (0.1)                            | 0                                  | 0.1 (-0.0 to 0.2)                   | -                            | -               |
| Endovascular treatment (No)                                                        | 2                                  | 0                                  |                                     |                              |                 |



|                                                  |          |          |                   |                     |      |
|--------------------------------------------------|----------|----------|-------------------|---------------------|------|
| Surgical treatment (No)                          | 0        | 0        |                   |                     |      |
| End stage kidney disease                         | 8 (0.4)  | 3 (0.2)  | 0.3 (-0.1 to 0.6) | 2.63 (0.70 to 9.90) | 0.14 |
| Discontinuation of statin treatment              | 35 (1.8) | 34 (1.8) | 0.0 (-0.8 to 0.9) | 1.01 (0.63 to 1.63) | 0.96 |
| Cataract surgery                                 | 49 (2.5) | 28 (1.5) | 1.1 (0.2 to 1.9)  | 1.73 (1.09 to 2.76) | 0.02 |
| Composite of laboratory detected abnormalities¶: | 23 (1.2) | 16 (0.8) | 0.3 (-0.3 to 1.0) | 1.42 (0.75 to 2.69) | 0.28 |
| Increase in aminotransferase (No)                | 10       | 7        |                   |                     |      |
| Increase in creatine kinase (No)                 | 3        | 3        |                   |                     |      |
| Increase in creatinine (No)                      | 10       | 6        |                   |                     |      |

CI=confidence interval.

\*Primary and secondary outcomes were evaluated in the per-protocol population three years after randomisation. The listed percentages were estimated using the Kaplan-Meier method, so values might not calculate mathematically.

†Calculated using log rank test.

‡All coronary revascularisations were clinically indicated by a diameter stenosis  $\geq 50\%$  on invasive coronary angiography with ischaemic symptoms or signs or  $\geq 70\%$  even in the absence of symptoms or signs.

§Data are number of patients/total number of patients (%).

¶An increase in aminotransferase level was defined as more than baseline level and  $>3$  times the upper reference limit; an increase in creatine kinase level was defined as more than baseline level and  $>5$  times the upper reference limit; and an increase in creatinine level was defined as  $>50\%$  increase from baseline and greater than the upper reference limit.

**Supplementary table S8. Serial changes in lipid profiles**

|                                                  | <b>Rosuvastatin group</b> | <b>Atorvastatin group</b> | <b>Absolute difference (95% CI)</b> | <b>P-value</b> |
|--------------------------------------------------|---------------------------|---------------------------|-------------------------------------|----------------|
| Lipid profile, mean ± standard deviation, mmol/L |                           |                           |                                     |                |
| At 6 weeks                                       |                           |                           |                                     |                |
| Number of patients                               | 1570                      | 1629                      |                                     |                |
| LDL cholesterol                                  | 1.71±0.56                 | 1.82±0.54                 | -0.11 (-0.15 to -0.08)              | <0.001         |
| Total cholesterol                                | 3.52±0.70                 | 3.51±0.71                 | 0.00 (-0.04 to 0.05)                | 0.89           |
| Triglyceride                                     | 1.45±0.72                 | 1.42±0.77                 | 0.03 (-0.02 to 0.08)                | 0.26           |
| HDL cholesterol                                  | 1.23±0.30                 | 1.22±0.29                 | 0.01 (-0.01 to 0.03)                | 0.39           |
| At 3 months                                      |                           |                           |                                     |                |
| Number of patients                               | 447                       | 391                       |                                     |                |
| LDL cholesterol                                  | 1.65±0.57                 | 1.79±0.59                 | -0.15 (-0.23 to -0.07)              | <0.001         |
| Total cholesterol                                | 3.51±0.76                 | 3.51±0.73                 | 0.00 (-0.1 to 0.1)                  | 0.99           |
| Triglyceride                                     | 1.54±1.07                 | 1.59±1.11                 | -0.05 (-0.20 to 0.10)               | 0.50           |
| HDL cholesterol                                  | 1.20±0.33                 | 1.18±0.29                 | 0.02 (-0.02 to 0.06)                | 0.32           |
| At 6 months                                      |                           |                           |                                     |                |
| Number of patients                               | 1098                      | 1068                      |                                     |                |
| LDL cholesterol                                  | 1.70±0.57                 | 1.83±0.54                 | -0.13 (-0.17 to -0.08)              | <0.001         |
| Total cholesterol                                | 3.56±0.71                 | 3.56±0.73                 | 0.01 (-0.05 to 0.07)                | 0.81           |
| Triglyceride                                     | 1.48±0.81                 | 1.47±0.83                 | 0.01 (-0.06 to 0.08)                | 0.78           |
| HDL cholesterol                                  | 1.23±0.31                 | 1.23±0.30                 | -0.00 (-0.03 to 0.03)               | 0.99           |
| At 1 year                                        |                           |                           |                                     |                |
| Number of patients                               | 1875                      | 1841                      |                                     |                |
| LDL cholesterol                                  | 1.74±0.57                 | 1.83±0.55                 | -0.09 (-0.12 to -0.05)              | <0.001         |
| Total cholesterol                                | 3.55±0.71                 | 3.53±0.71                 | 0.01 (-0.03 to 0.06)                | 0.56           |
| Triglyceride                                     | 1.51±0.92                 | 1.45±0.82                 | 0.06 (0.00 to 0.11)                 | 0.04           |
| HDL cholesterol                                  | 1.23±0.31                 | 1.23±0.30                 | 0.00 (-0.02 to 0.02)                | 0.79           |

|                    |           |           |                        |        |
|--------------------|-----------|-----------|------------------------|--------|
| At 2 years         |           |           |                        |        |
| Number of patients | 1673      | 1660      |                        |        |
| LDL cholesterol    | 1.70±0.57 | 1.77±0.51 | -0.07 (-0.11 to -0.03) | <0.001 |
| Total cholesterol  | 3.54±0.69 | 3.50±0.68 | 0.04 (-0.01 to 0.08)   | 0.11   |
| Triglyceride       | 1.45±0.83 | 1.42±0.79 | 0.02 (-0.03 to 0.08)   | 0.44   |
| HDL cholesterol    | 1.23±0.31 | 1.22±0.30 | 0.01 (-0.01 to 0.03)   | 0.33   |
| At 3 years         |           |           |                        |        |
| Number of patients | 1582      | 1532      |                        |        |
| LDL cholesterol    | 1.71±0.59 | 1.79±0.56 | -0.08 (-0.12 to -0.04) | <0.001 |
| Total cholesterol  | 3.53±0.70 | 3.50±0.69 | 0.03 (-0.02 to 0.08)   | 0.23   |
| Triglyceride       | 1.44±0.84 | 1.44±0.90 | -0.01 (-0.07 to 0.06)  | 0.86   |
| HDL cholesterol    | 1.21±0.30 | 1.20±0.29 | 0.01 (-0.01 to 0.03)   | 0.33   |

---

CI=confidence interval; HDL=high density lipoprotein; LDL=low density lipoprotein.

**Supplementary table S9. Reasons for discontinuing statin treatment by adverse event**

|                                  | <b>Rosuvastatin group<br/>(n=40)</b> | <b>Atorvastatin group<br/>(n=37)</b> |
|----------------------------------|--------------------------------------|--------------------------------------|
| General weakness                 | 13 (32.5)                            | 13 (35.1)                            |
| Gastrointestinal symptoms        | 11 (27.5)                            | 7 (18.9)                             |
| Muscle symptoms                  | 10 (25.0)                            | 4 (10.8)                             |
| Itching or urticaria             | 0                                    | 2 (5.4)                              |
| Dizziness or peripheral numbness | 0                                    | 4 (10.8)                             |
| Creatine kinase elevation        | 3 (7.5)                              | 3 (8.1)                              |
| Liver enzyme elevation           | 2 (5.0)                              | 0                                    |
| Other                            | 1 (2.5)                              | 4 (10.8)                             |

**Supplementary table S10. Primary outcome by statin intensity strategy and statin type**

|                                                                                                          | Treat-to-target strategy<br>(n=2200) |                                   |                           |         | High intensity statin strategy<br>(n=2200) |                                   |                           |         | P-value<br>for<br>interaction |
|----------------------------------------------------------------------------------------------------------|--------------------------------------|-----------------------------------|---------------------------|---------|--------------------------------------------|-----------------------------------|---------------------------|---------|-------------------------------|
|                                                                                                          | Rosuvastatin<br>group<br>(n=1098)    | Atorvastatin<br>group<br>(n=1102) | HR<br>(95% CI)            | P-value | Rosuvastatin<br>group<br>(n=1106)          | Atorvastatin<br>group<br>(n=1094) | HR<br>(95% CI)            | P-value |                               |
| Primary outcome<br>(death,<br>myocardial<br>infarction, stroke,<br>or any coronary<br>revascularization) | 92 (8.5)                             | 85 (7.8)                          | 1.09<br>(0.82 to<br>1.47) | 0.55    | 97 (8.8)                                   | 93 (8.6)                          | 1.03<br>(0.77 to<br>1.37) | 0.85    | 0.77                          |

Data are number (% of the cumulative rates at 3 years according to Kaplan-Meier event rates). CI=confidence interval; HR=hazard ratio.

Supplementary fig S1. Proportion of participants with LDL cholesterol levels <1.8 mmol/L

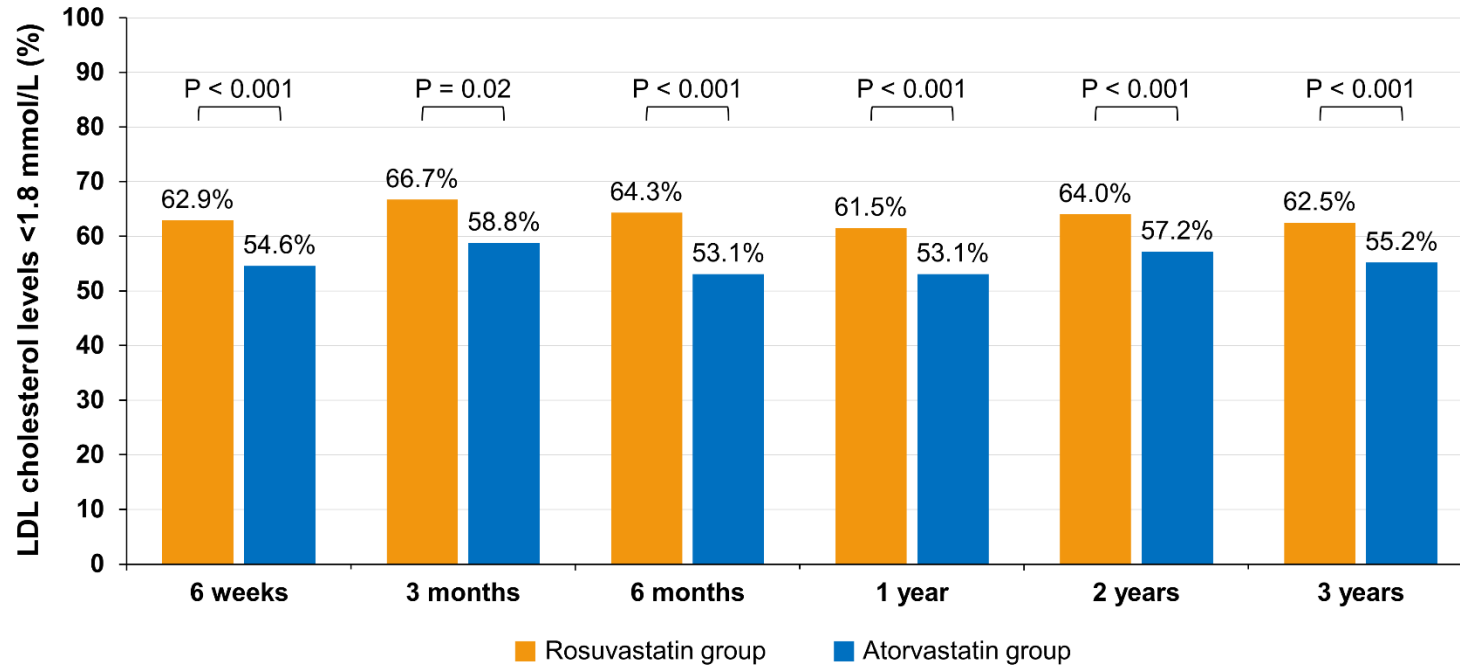

Proportion of participants achieving LDL cholesterol levels <1.8 mmol/L over time in participants assigned to rosuvastatin or atorvastatin. LDL=low density lipoprotein.

Supplementary fig S2. Time-to-event curves of the cataract surgery

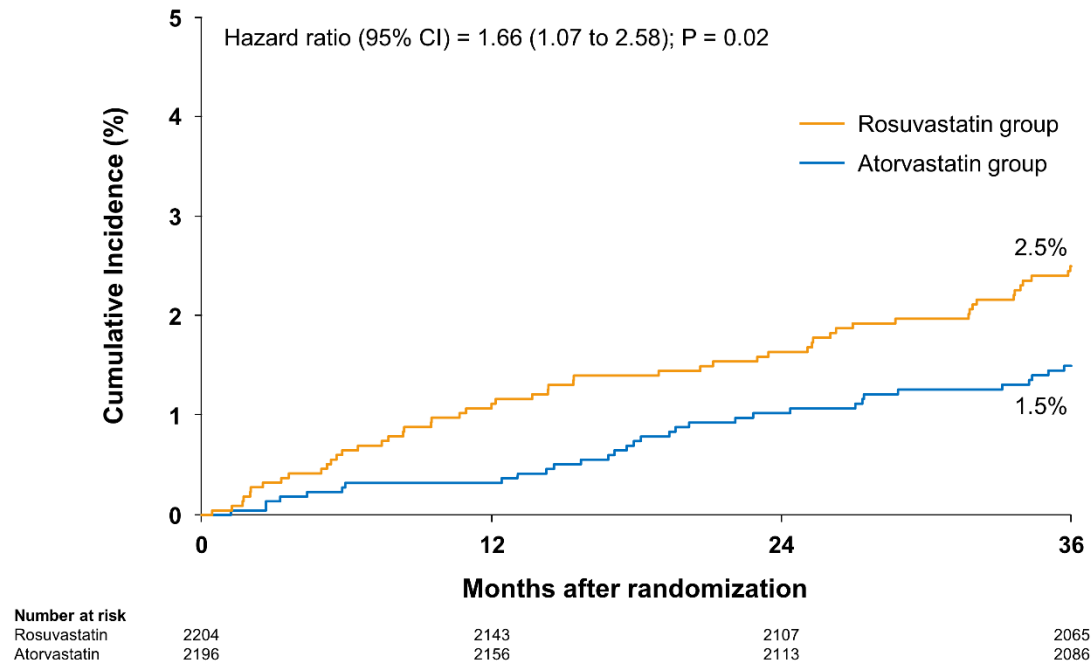

Kaplan-Meier survival curves for the cataract surgery in participants assigned to rosuvastatin or atorvastatin. CI=confidence interval.

**Supplementary fig S3. Subgroup analysis for the primary outcome**

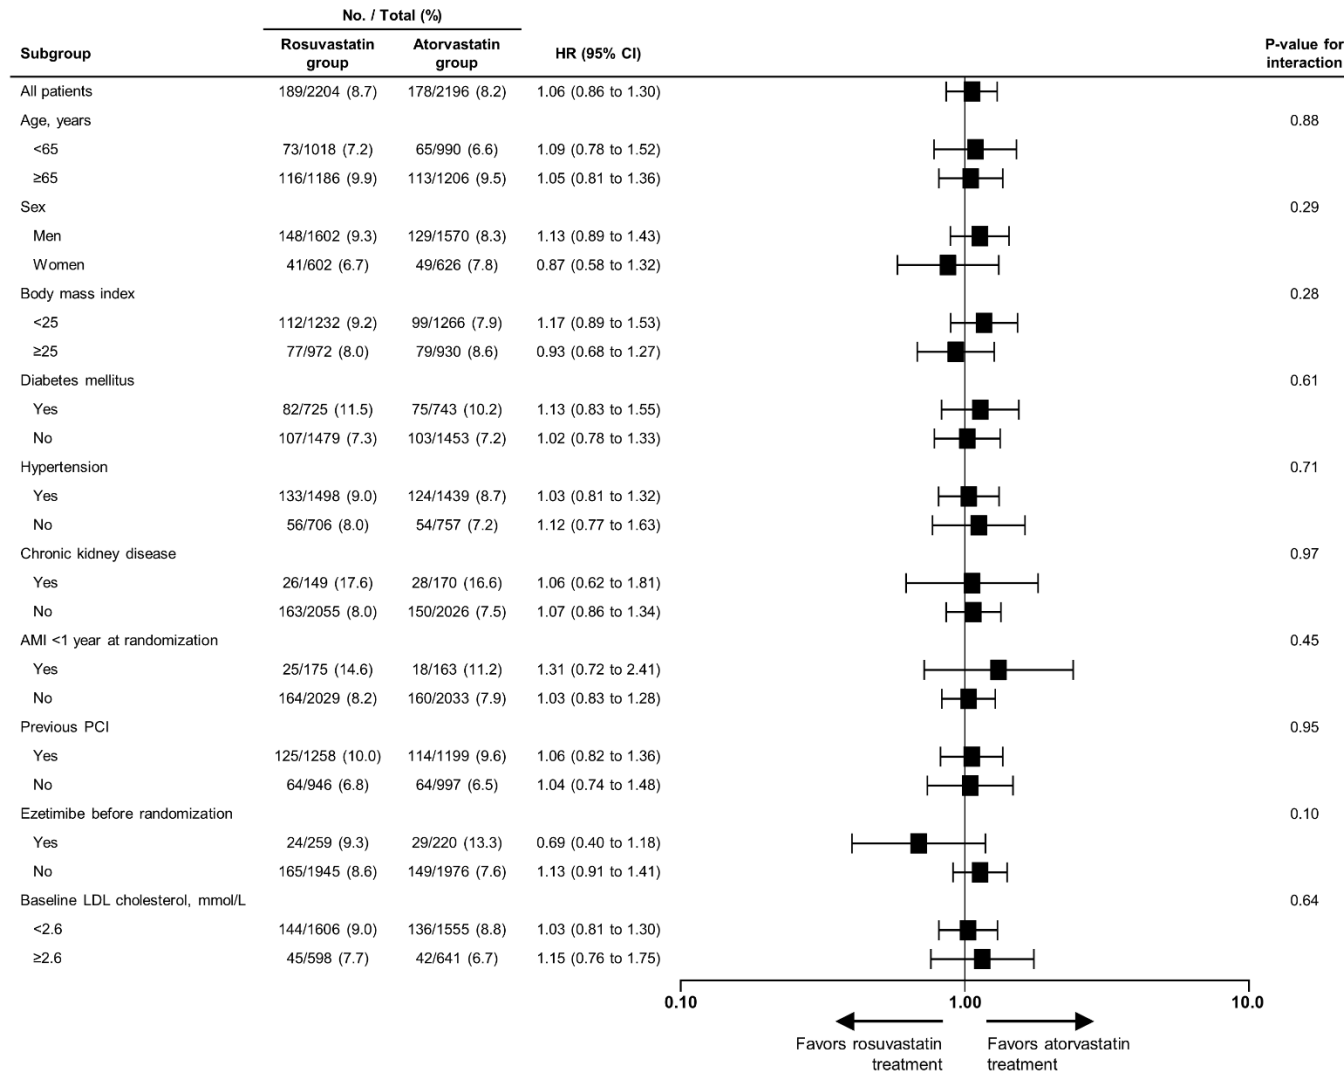

AMI=acute myocardial infarction; CI=confidence interval; HR=hazard ratio; LDL=low density lipoprotein; PCI=percutaneous coronary intervention.
